# Supplementary material for: Strong Evidence for an Intraspecific Metabolic Scaling Coefficient Near 0.89 in Fish
Source: PubMed Central journal article supplement (PMC6763608; doi:10.3389/fphys.2019.01166), 2019-09-20
Supplement: Data_Sheet_1.pdf [file Data_Sheet_1.pdf]

**Supplementary material**

**Supplementary material 1: By species regressions**

# Atlantic Cod (*Gadus morhua*)

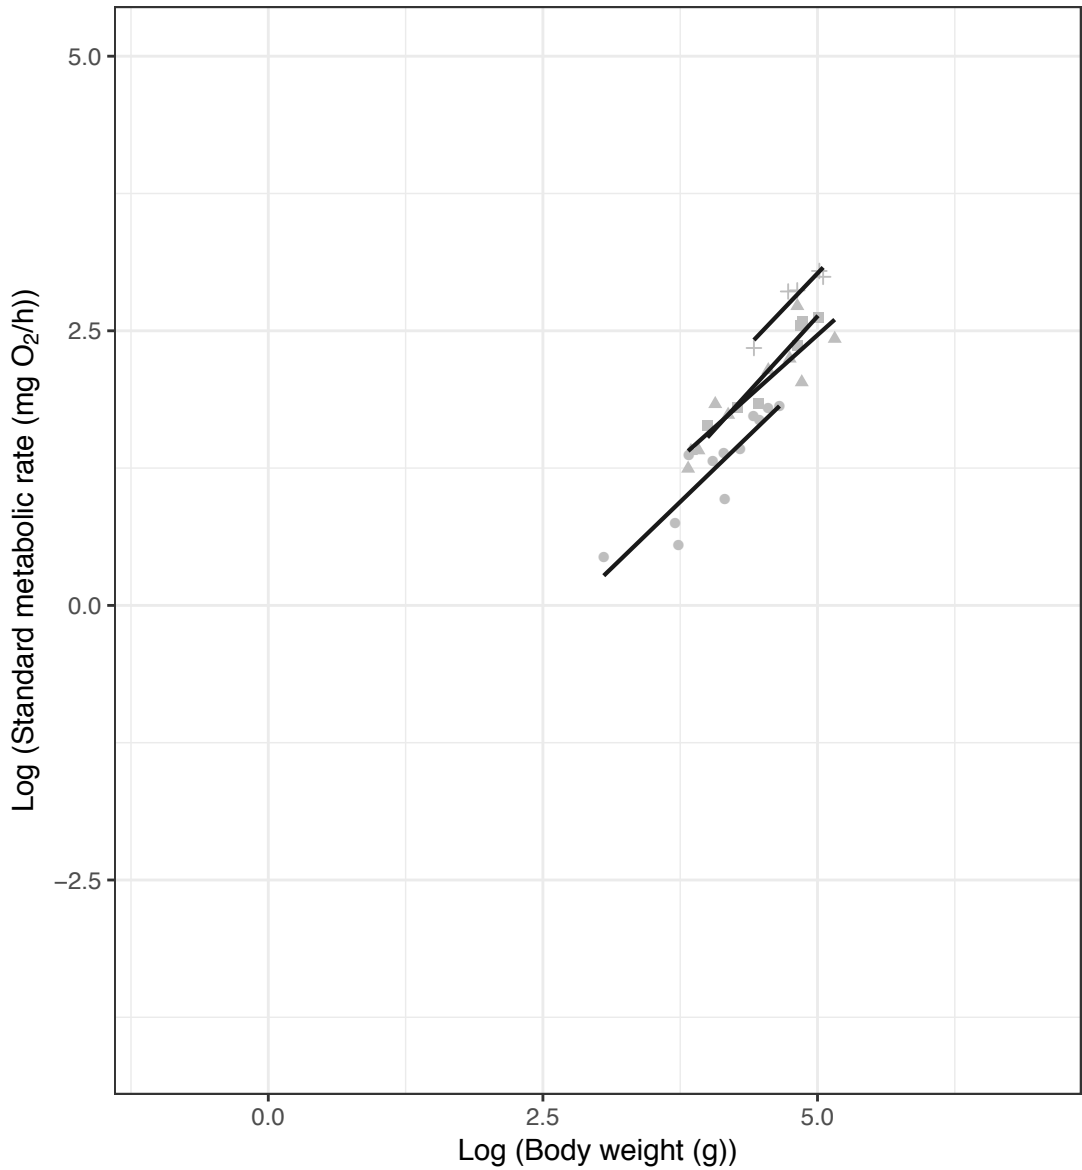

# Atlantic Salmon

*(Salmo salar)*

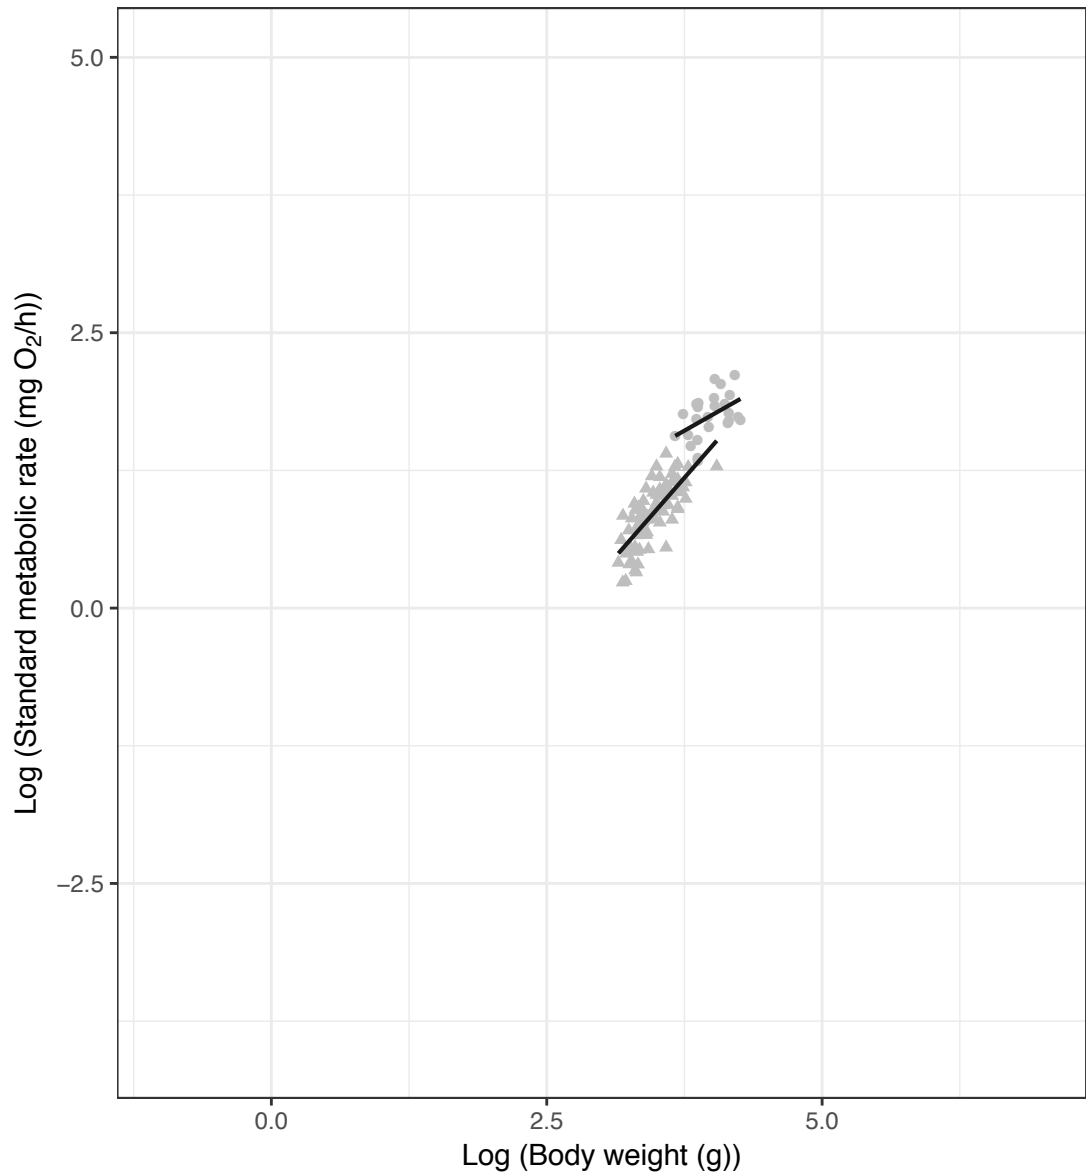

# Barramundi

(*Lates calcarifer*)

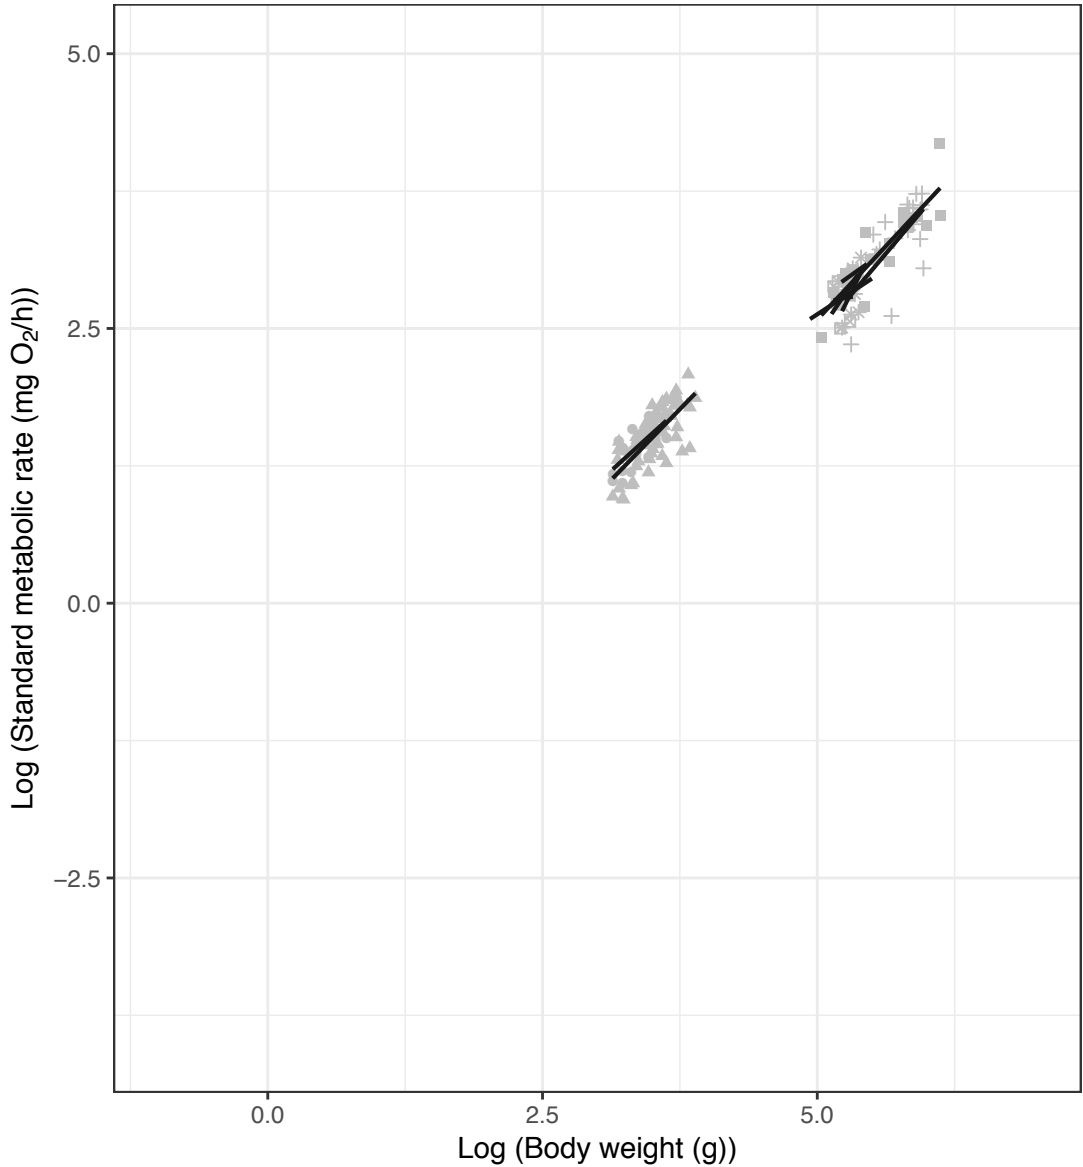

Trials 11, 23, 24, 25, 49, 50, 51, 52, and 53

# Brown Trout

(*Salmo trutta*)

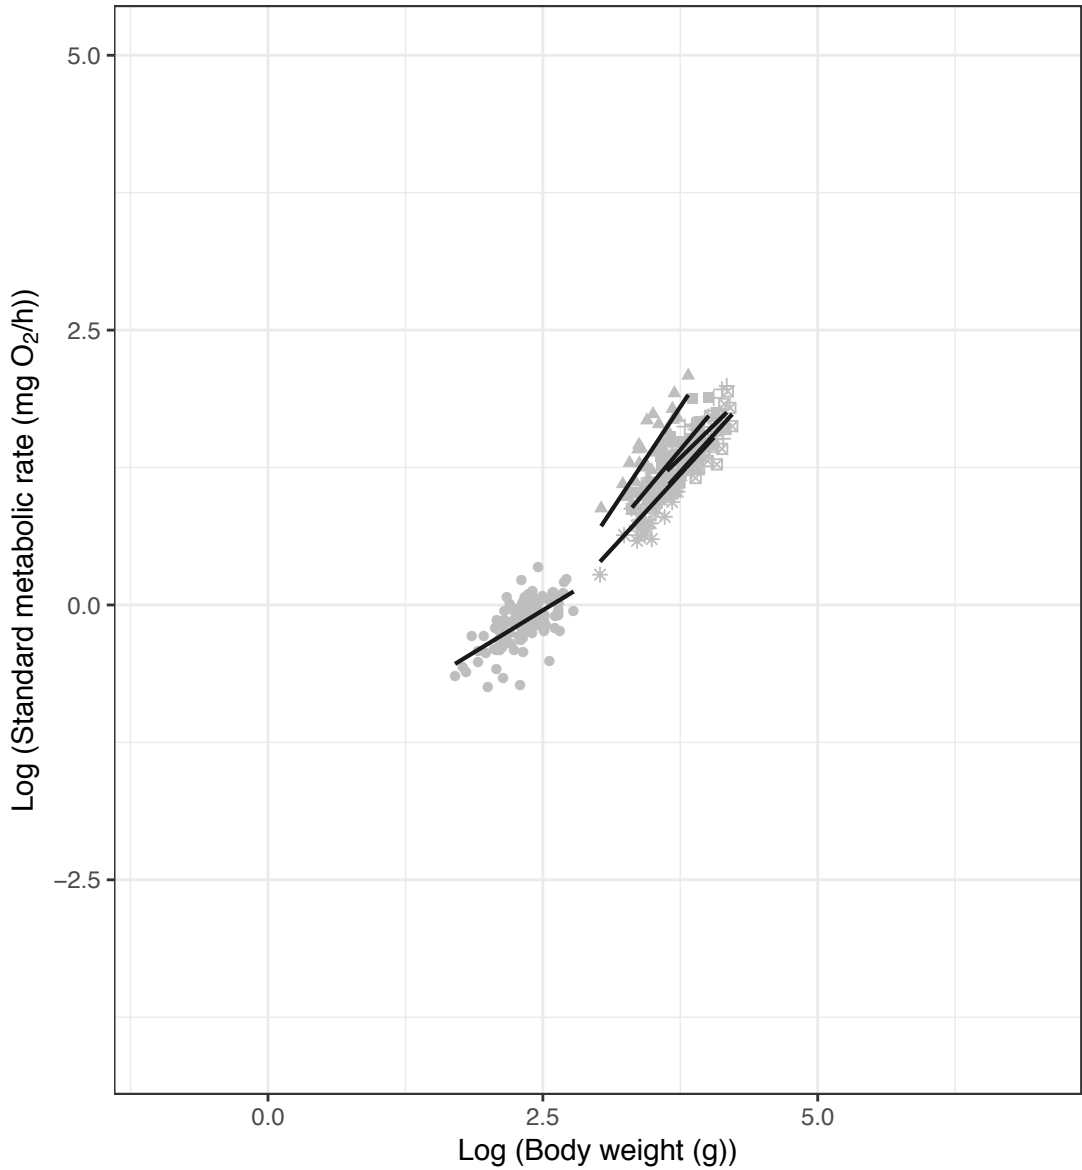

# Common Minnow

*(Phoxinus phoxinus)*

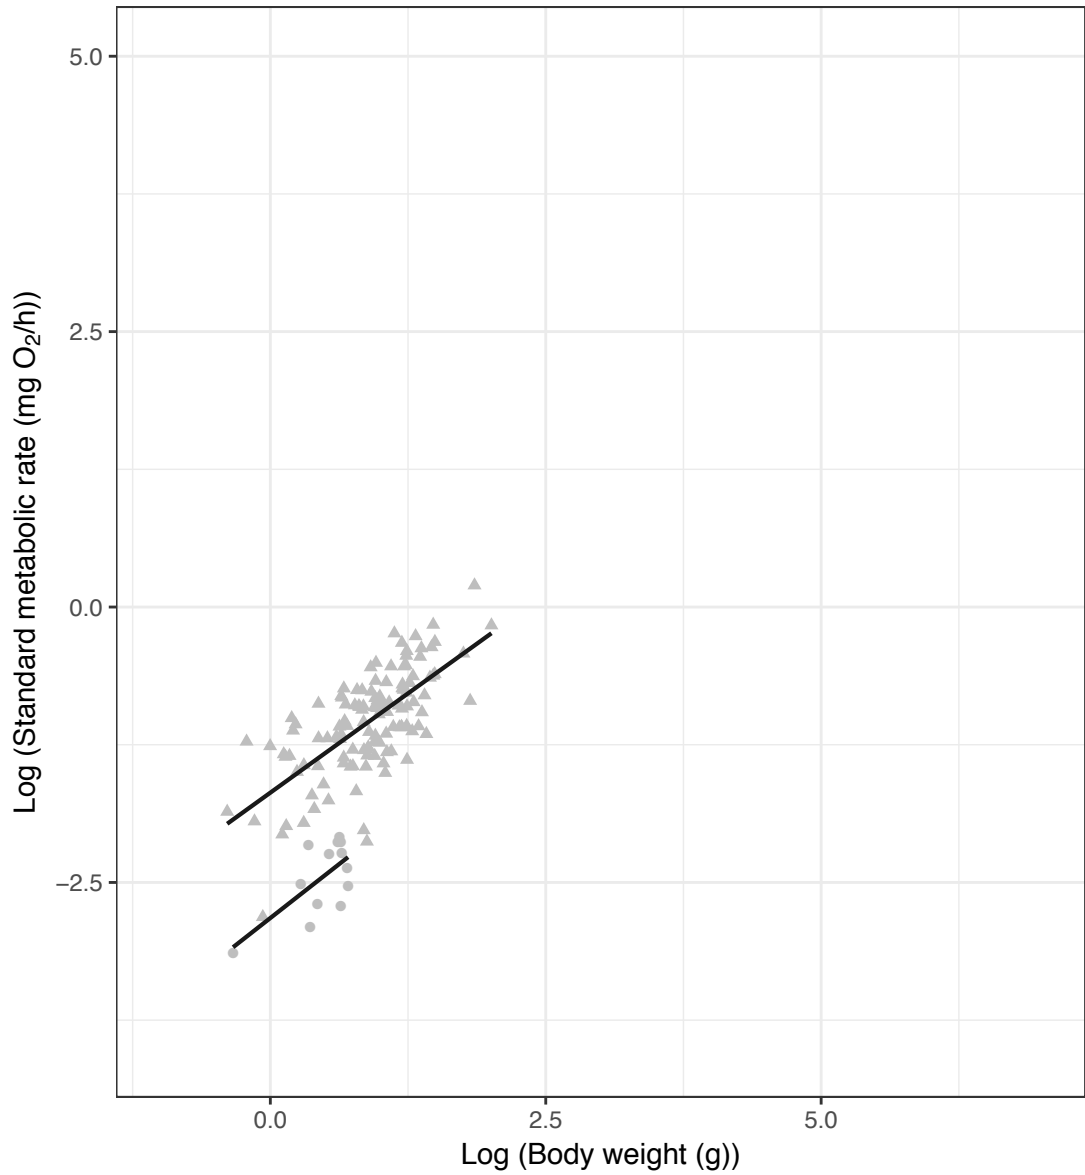

# Common Triplefin

(*Forsterygion lapillum*)

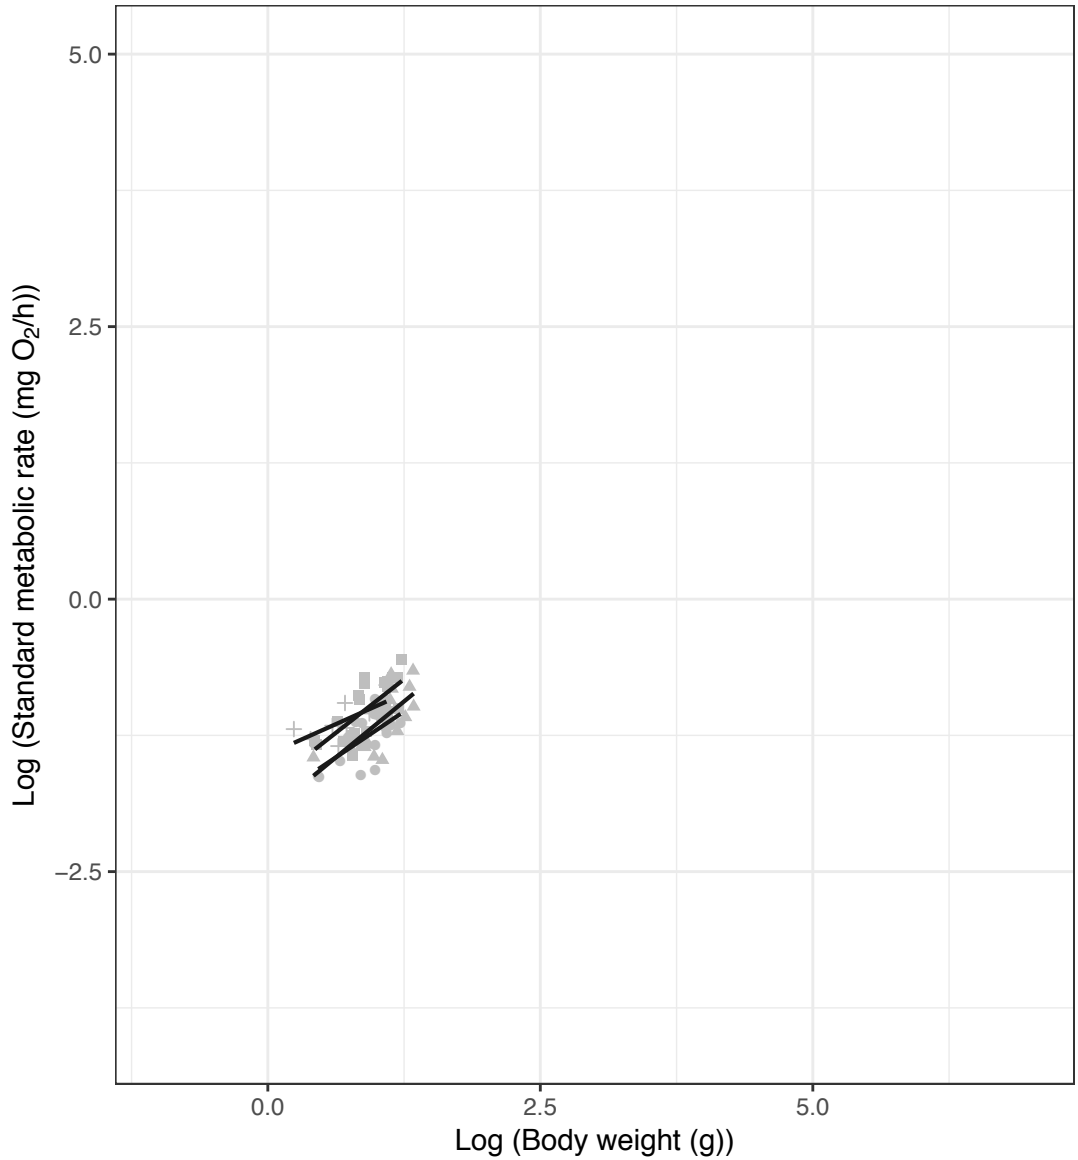

# Cunner

*(Tautogoabrus adspersus)*

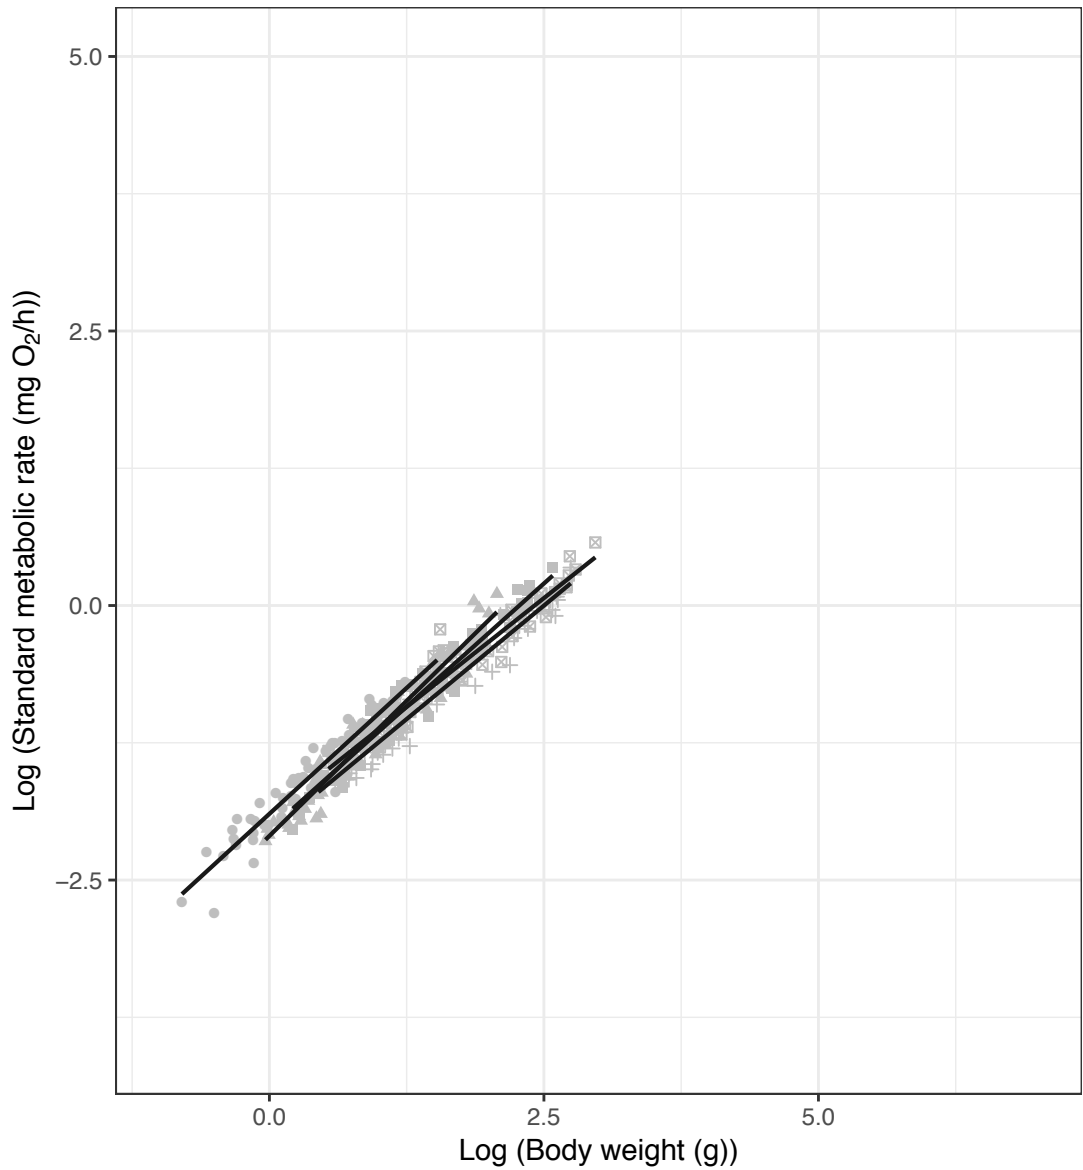

Trials 1, 2, 3, 4, and 5



# European Eel

*(Anguilla anguilla)*

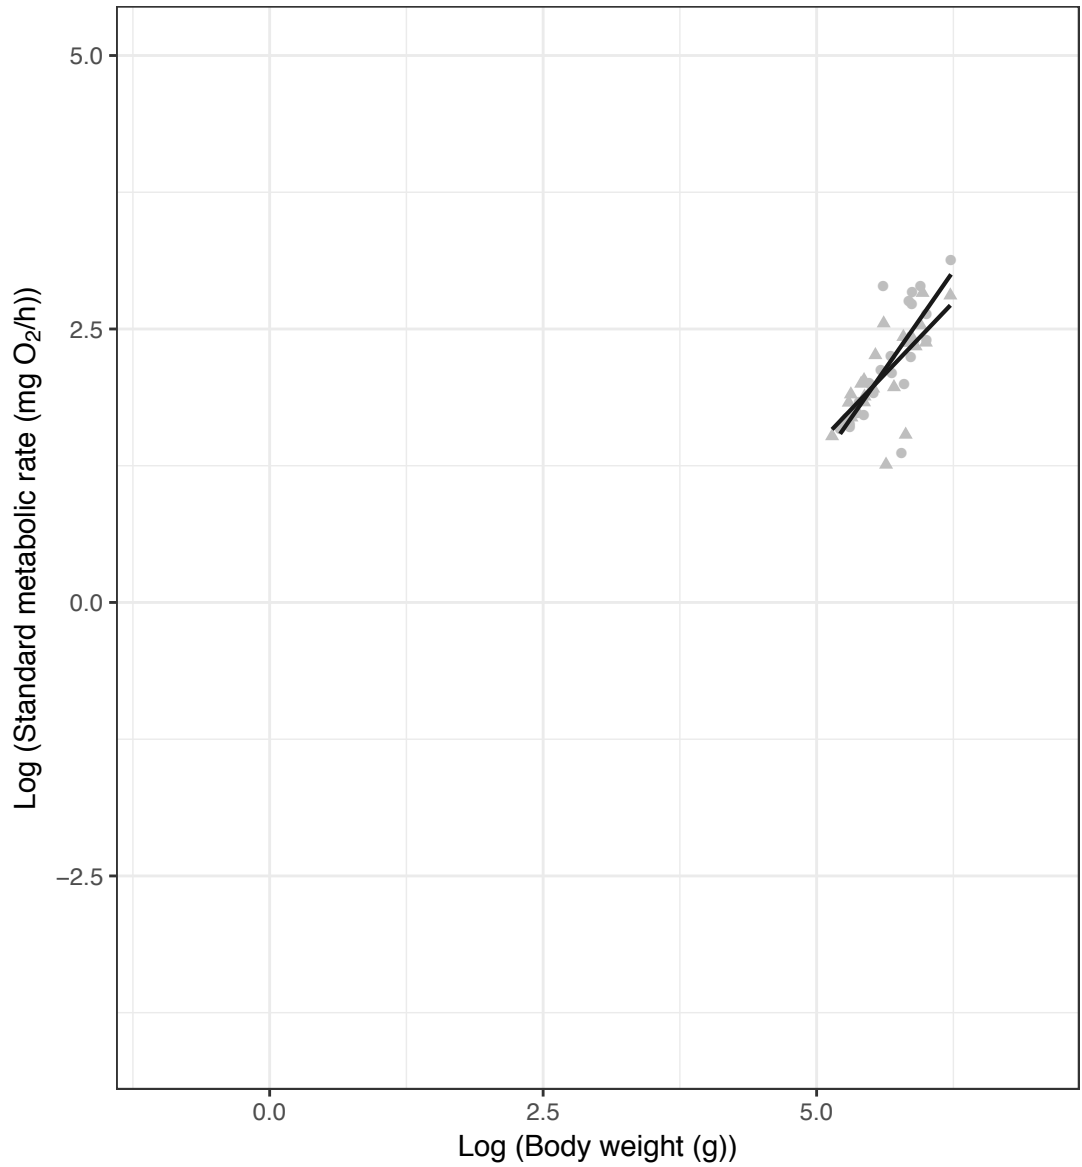

# Hapuku Wreckfish

*(Polyprion oxygeneios)*

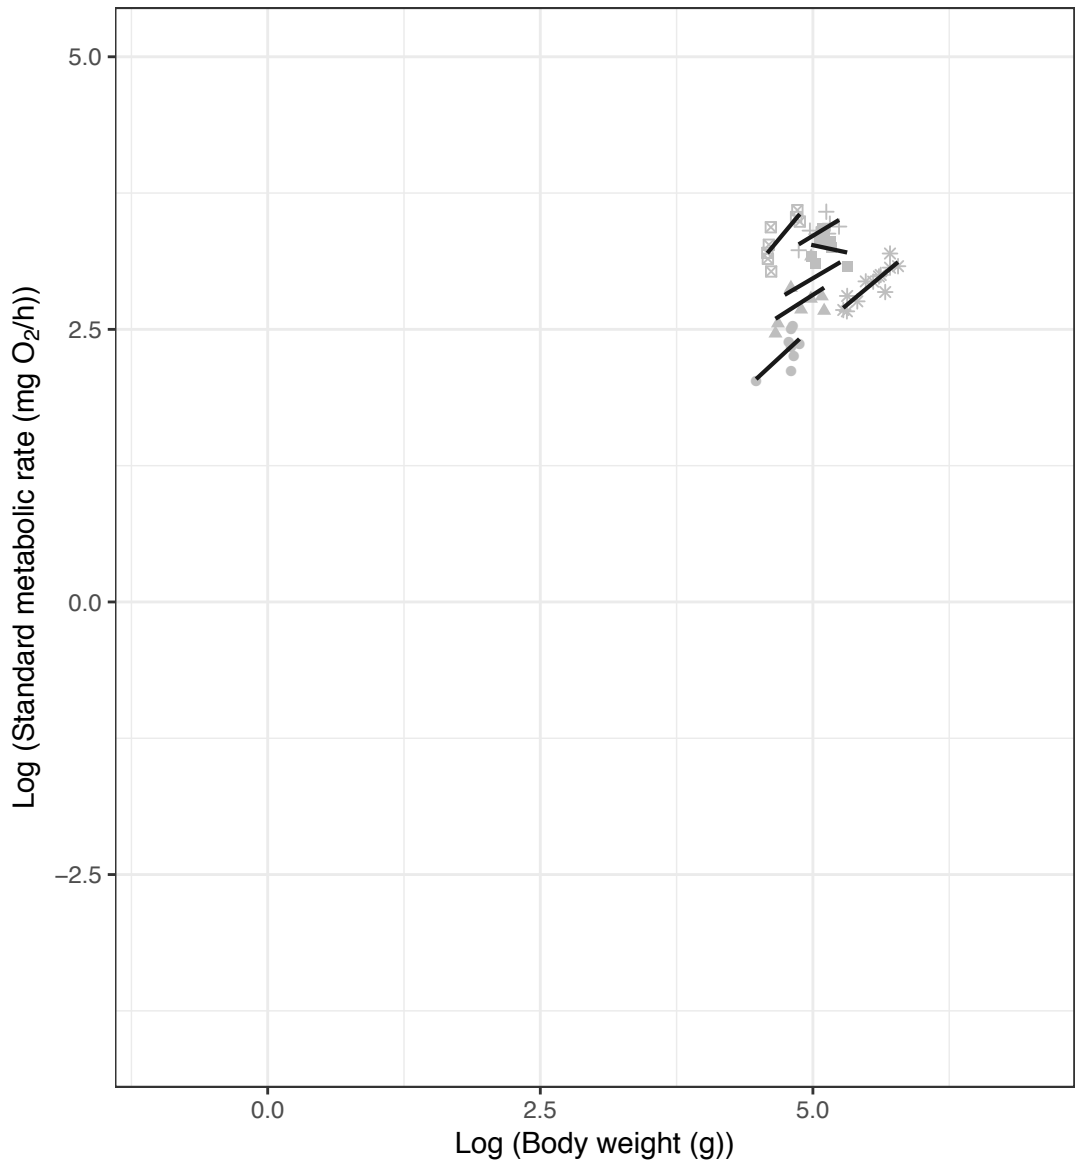

Trials 26, 27, 28, 29, 30, 33, and 34

# Polar Cod

*(Boreogadus saida)*

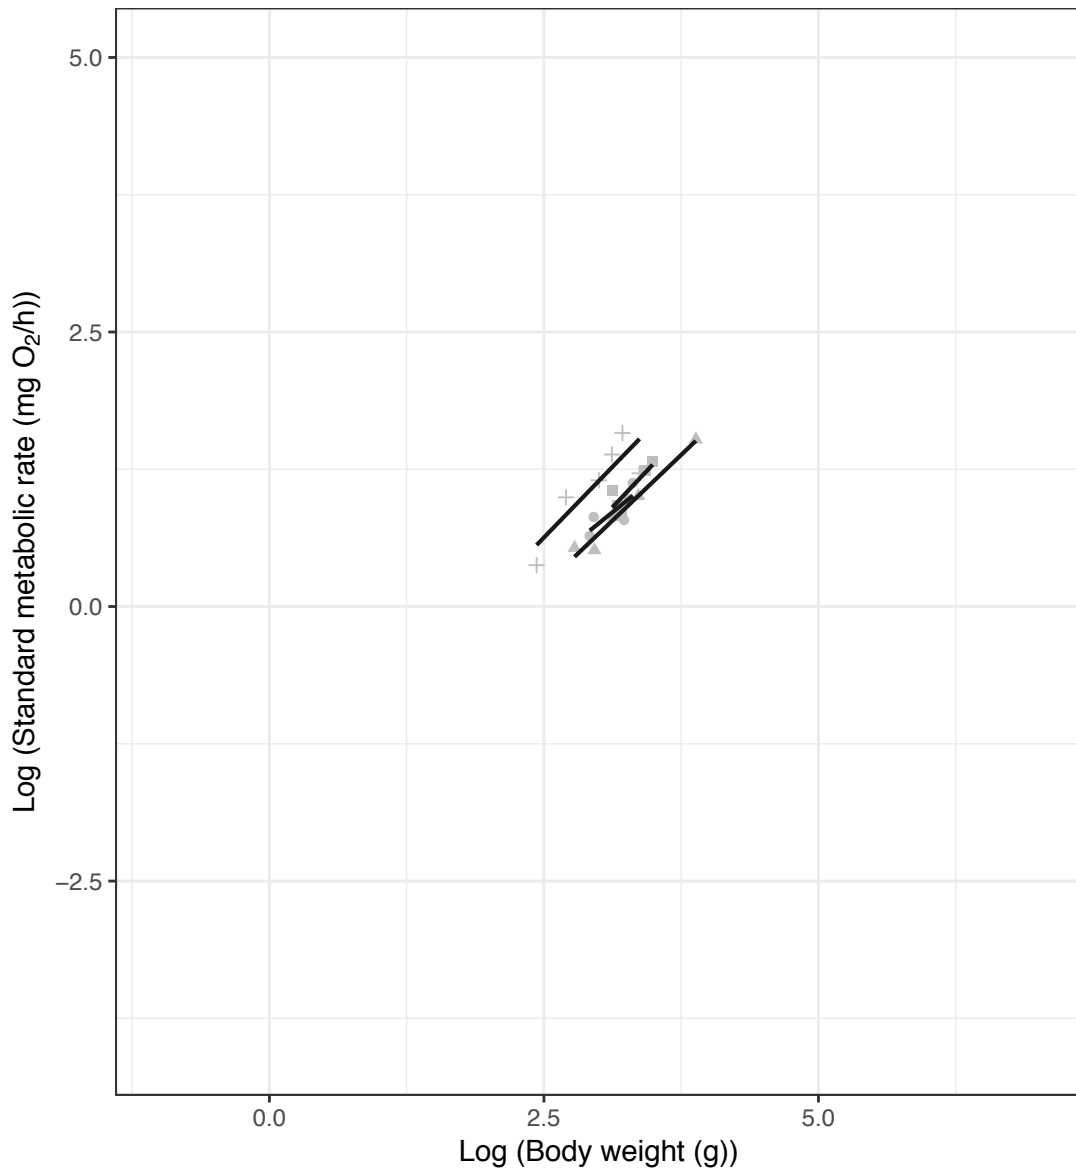

Trials 15, 16, 17, and 18

# Blue-green Puller

(*Chromis viridis*)

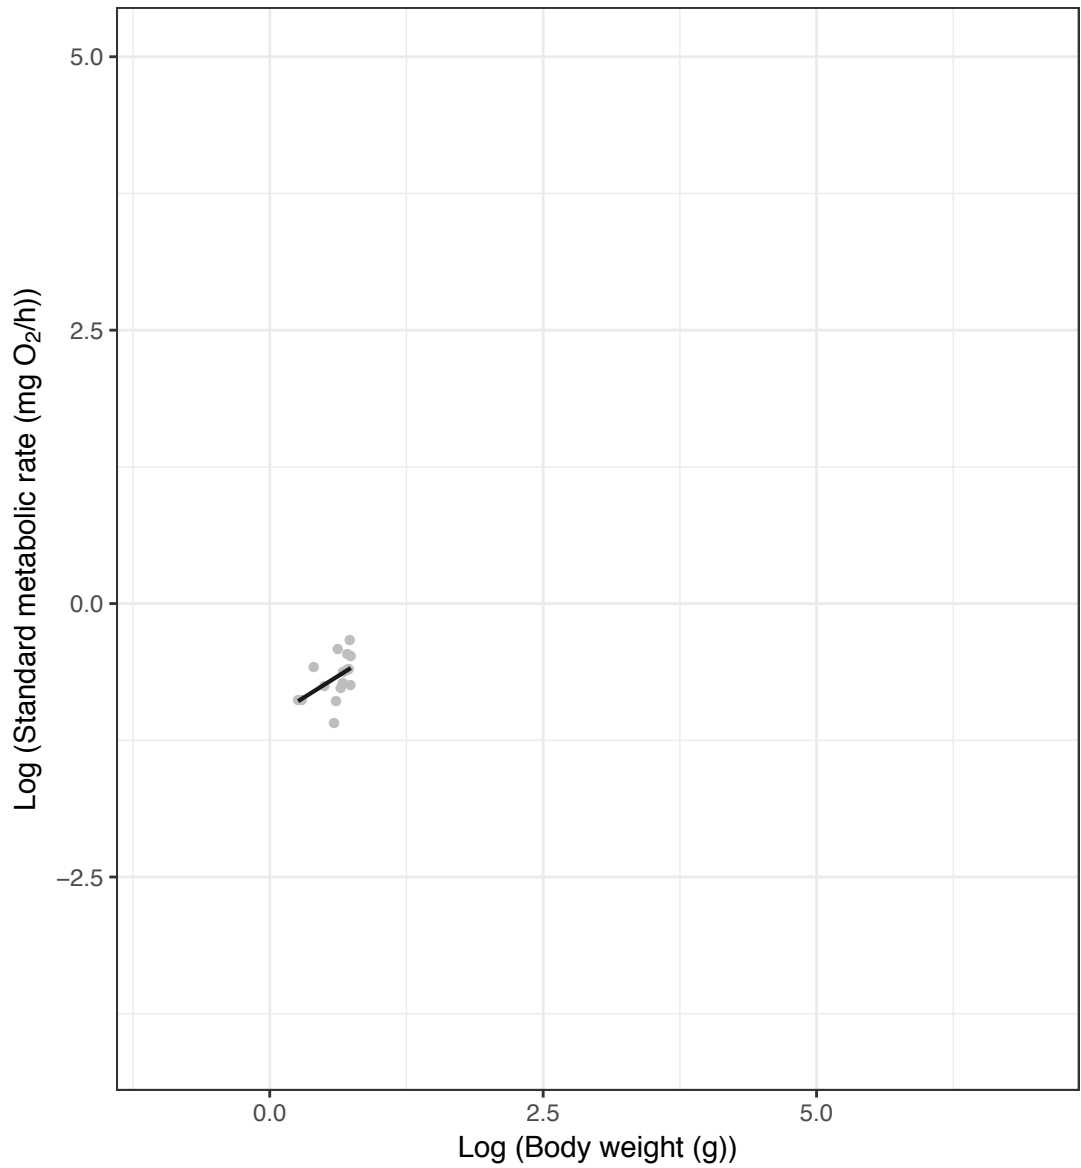

# Rainbow Trout

(*Oncorhynchus mykiss*)

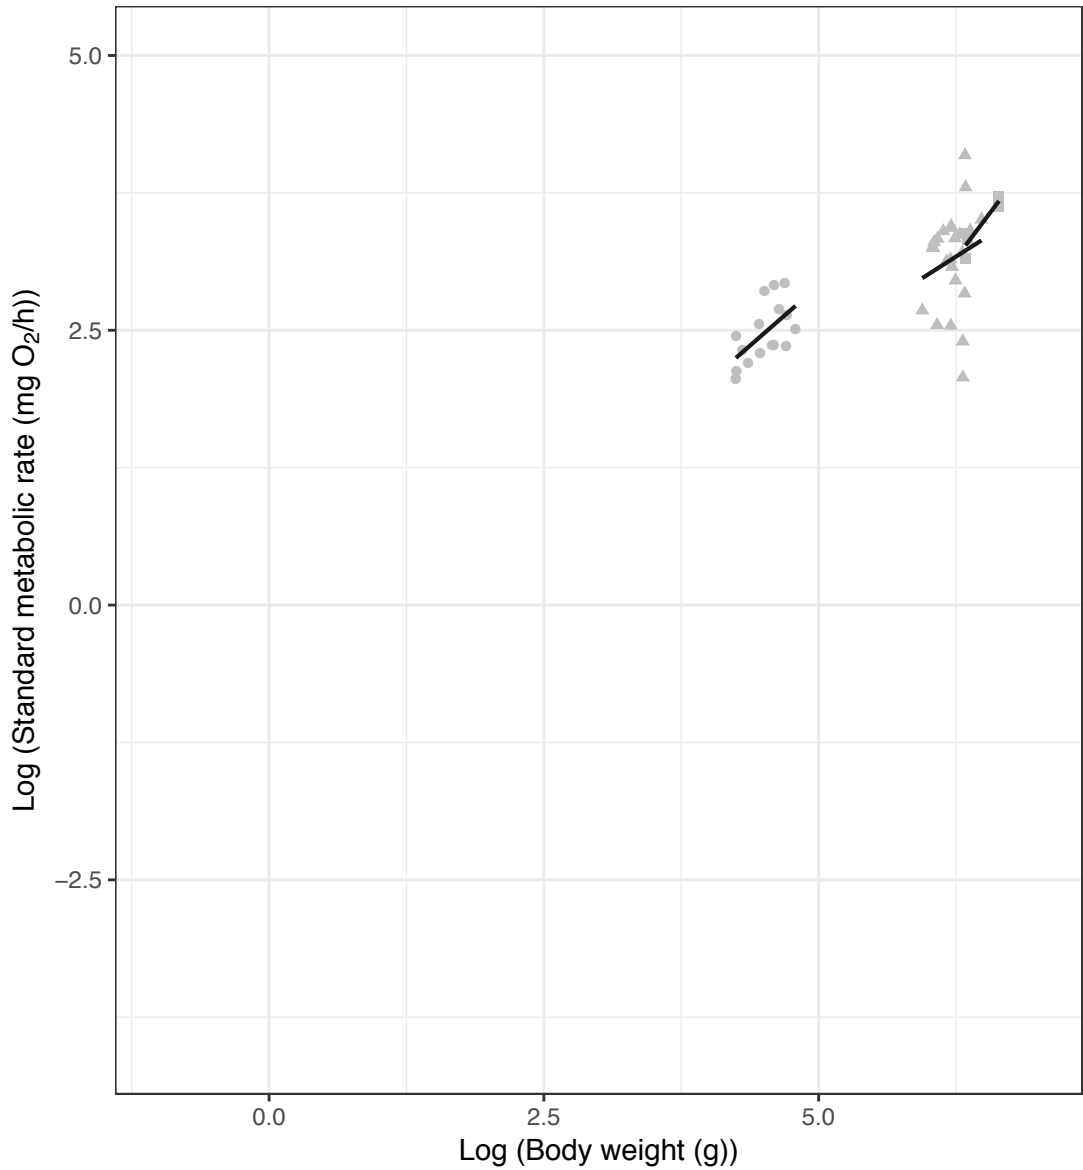

# Round Goby

*(Neogobius melanostomus)*

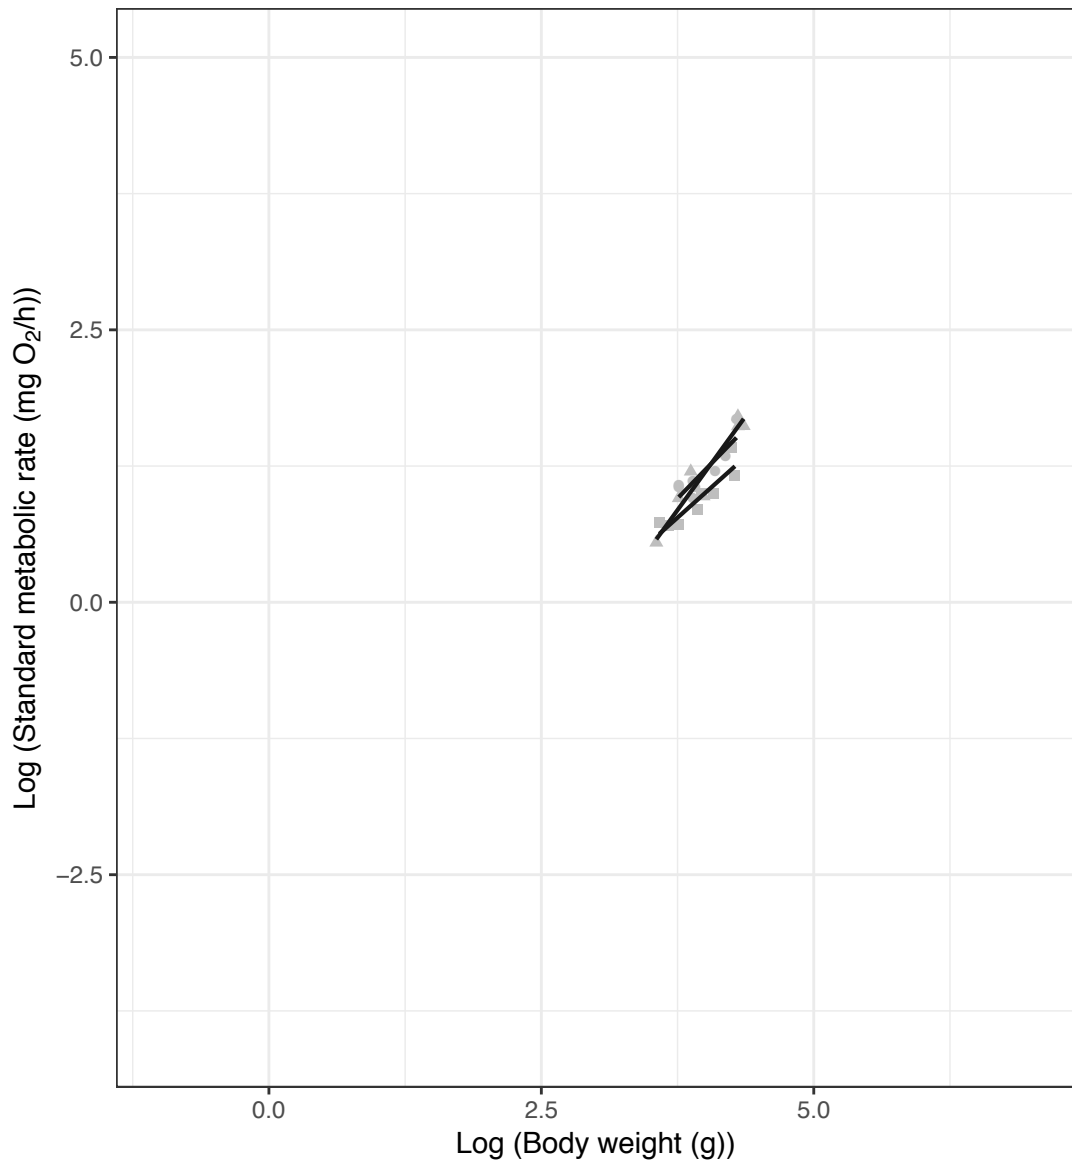

Trials 7, 8, and 9

# European Sea Bass

*(Dicentrarchus labrax)*

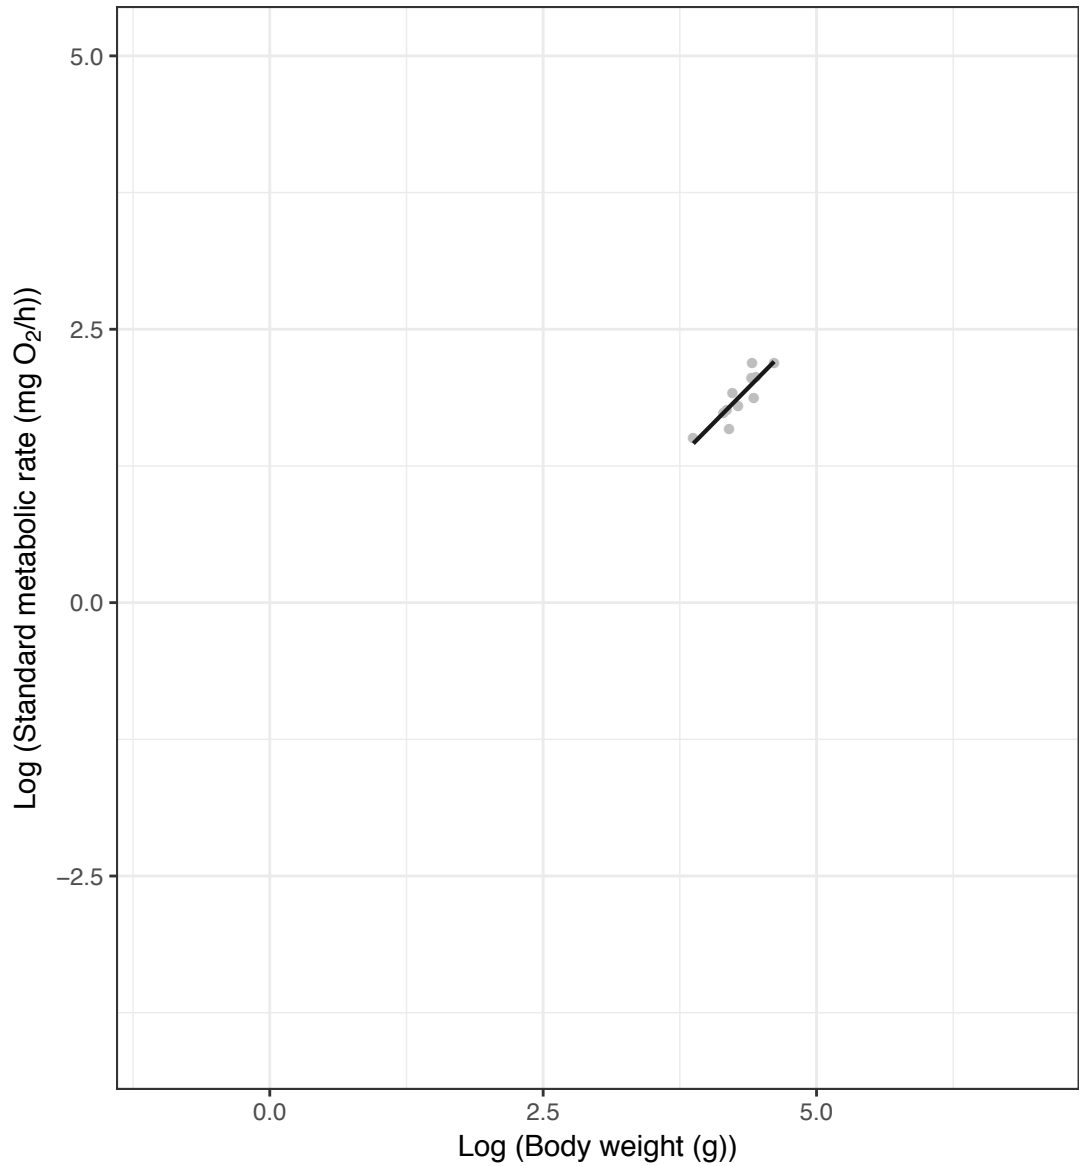

# Three-spined Stickleback

*(Gasterosteus aculeatus)*

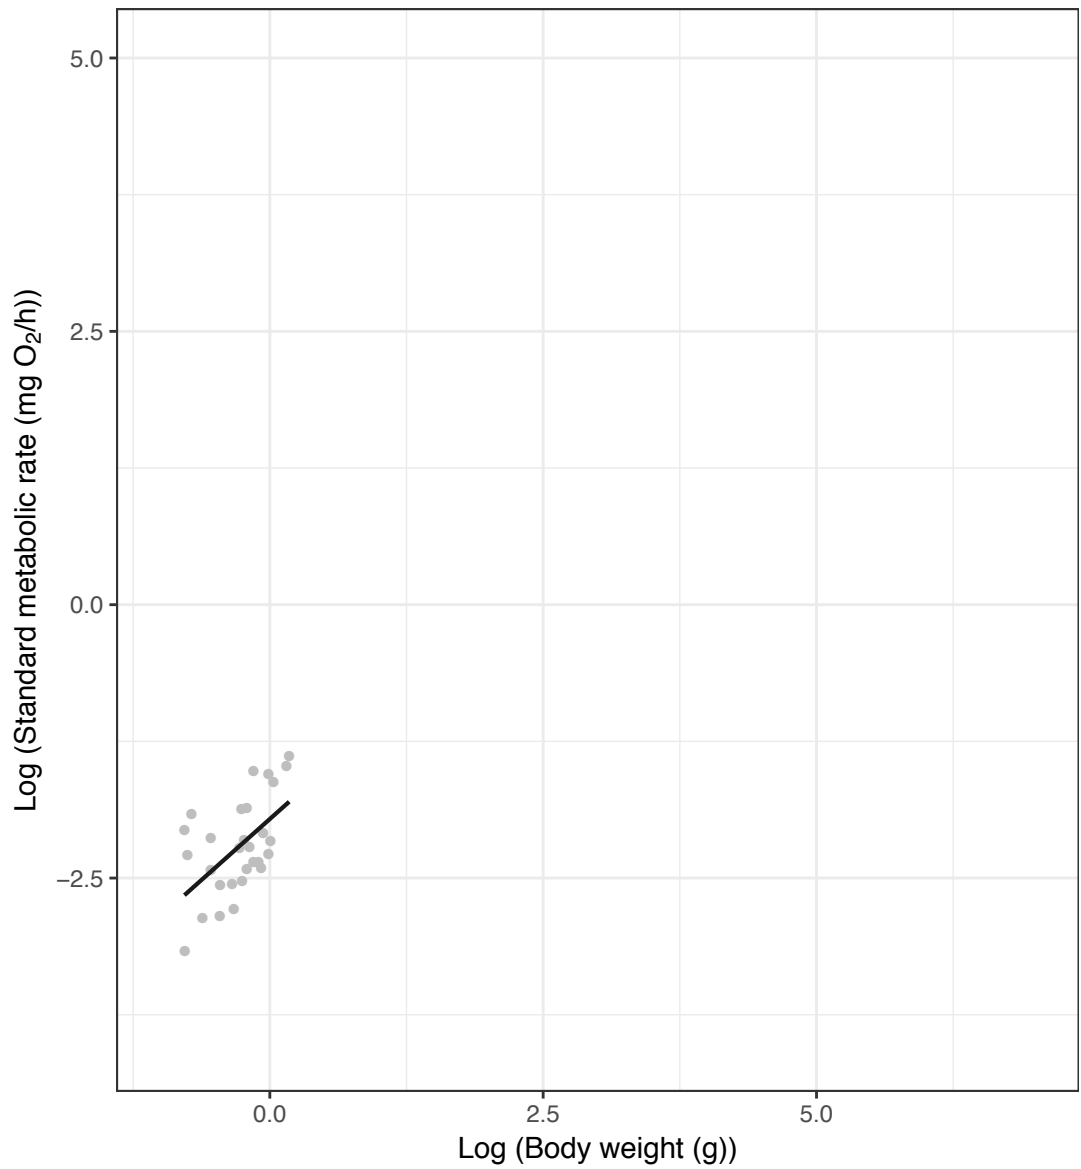



# Twister

*(Bellapiscis medius)*

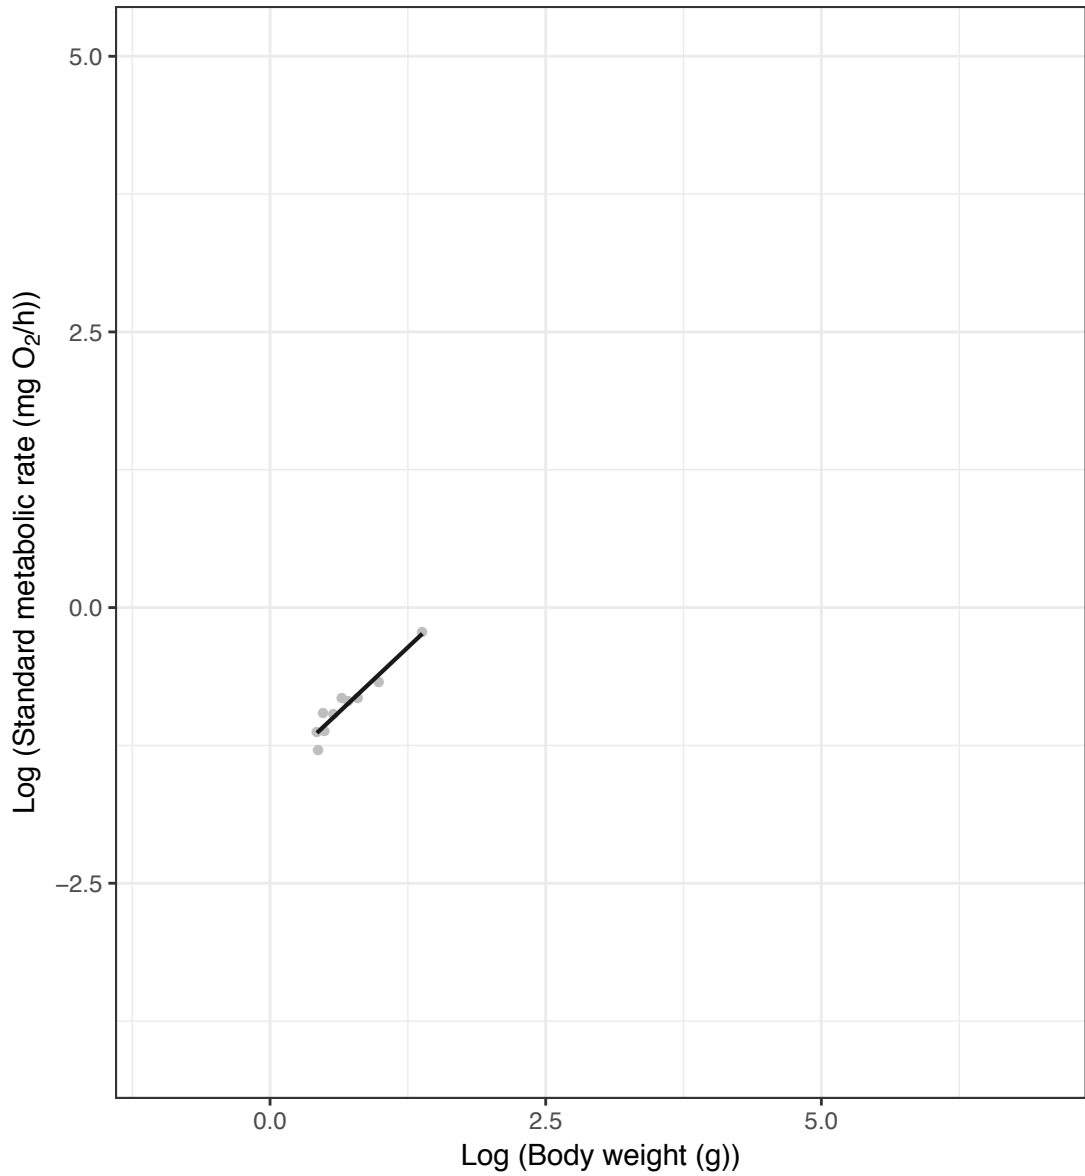

1 **Supplementary material 2: R output of each model with a free parameter for the slope**

2 **Model Suite 1: Random Intercept models**

3 **Fixed effect: Weight, Temp; Random effect: Species; Nested effect: Trial**

4

5 Formula:  $\log(\text{smr}) \sim \log(\text{bw\_g}) + \text{temp} + (1 | \text{species}) + (1 | \text{species}:\text{trial})$

6

7 AIC BIC logLik deviance  
8 -135.8 -104.1 73.9 -147.8

9

10 Random effects:

| Groups        | Name        | Variance | Std.Dev. |
|---------------|-------------|----------|----------|
| species:trial | (Intercept) | 0.02729  | 0.1652   |
| species       | (Intercept) | 0.19473  | 0.4413   |
| Residual      |             | 0.04673  | 0.2162   |

15

16 Fixed effects:

|             | Estimate  | Std. Error | t value |
|-------------|-----------|------------|---------|
| (Intercept) | -2.976927 | 0.189428   | -15.715 |
| log(bw_g)   | 0.868078  | 0.014608   | 59.423  |
| temp        | 0.065893  | 0.008853   | 7.443   |

21

22

23 **Model Suite 2: Estimated species intercept models**

24 **Fixed effect: Weight, Temp & Species, Nested effect: Trial**

25

26 Formula:  $\log(\text{smr}) \sim \log(\text{bw\_g}) + \text{temp} + \text{species} + (1 | \text{species}:\text{trial}) - 1$

27

28 AIC BIC logLik deviance  
29 -175.5 -69.8 107.7 -215.5

30 Random effects:

| Groups        | Name        | Variance | Std.Dev. |
|---------------|-------------|----------|----------|
| species:trial | (Intercept) | 0.01764  | 0.1328   |
| Residual      |             | 0.04672  | 0.2161   |

34

35 Fixed effects:

|                                | Estimate  | Std. Error | t value |
|--------------------------------|-----------|------------|---------|
| log(bw_g)                      | 0.866399  | 0.014747   | 58.749  |
| temp                           | 0.079591  | 0.008419   | 9.453   |
| speciesAtlantic_Cod            | -2.595677 | 0.128265   | -20.237 |
| speciesAtlantic_Salmon         | -2.967810 | 0.156093   | -19.013 |
| speciesBarramundi              | -3.845463 | 0.248164   | -15.496 |
| speciesBlue_green_puller       | -3.506407 | 0.283329   | -12.376 |
| speciesBrown_Trout             | -3.088307 | 0.143155   | -21.573 |
| speciesCommon_Minnow           | -3.221242 | 0.139432   | -23.103 |
| speciesCommon_Tripelfin        | -3.383674 | 0.173440   | -19.509 |
| speciesCunner                  | -3.201778 | 0.141166   | -22.681 |
| speciesE_sea_bass              | -3.152090 | 0.212755   | -14.816 |
| speciesEuropean_Eel            | -4.347451 | 0.212546   | -20.454 |
| speciesHapuku_Wreckfish        | -2.793287 | 0.178356   | -15.661 |
| speciesPolar_Cod               | -2.087451 | 0.100664   | -20.737 |
| speciesRainbow_Trout           | -2.974013 | 0.163135   | -18.230 |
| speciesRound_Goby              | -3.768955 | 0.185149   | -20.356 |
| speciesThree_Spine_Stickleback | -3.050021 | 0.171394   | -17.795 |
| speciesTwister                 | -3.156603 | 0.231724   | -13.622 |

54

55

56 **Model Suite 3: Random intercepts with random slopes**  
 57 **Fixed Effect: Weight & Temp; Random: Species & Slope; Nested effect: Trial**

58  
 59 Formula:  $\log(\text{smr}) \sim \log(\text{bw\_g}) + (1 + \log(\text{bw\_g}) \mid \text{species}:\text{trial}) + \text{temp} + (1 \mid \text{species})$   
 60

|    |        |        |        |          |
|----|--------|--------|--------|----------|
| 61 | AIC    | BIC    | logLik | deviance |
| 62 | -147.8 | -105.6 | 81.9   | -163.8   |

63  
 64 Random effects:

| 65 | Groups        | Name        | Variance | Std.Dev. |
|----|---------------|-------------|----------|----------|
| 66 | species:trial | (Intercept) | 0.070458 | 0.2654   |
| 67 | log(bw_g)     |             | 0.004998 | 0.0707   |
| 68 | species       | (Intercept) | 0.231253 | 0.4809   |
| 69 | Residual      |             | 0.045650 | 0.2137   |

70  
 71 Fixed effects:

| 72             | Estimate  | Std. Error | t value |
|----------------|-----------|------------|---------|
| 73 (Intercept) | -3.019453 | 0.206274   | -14.638 |
| 74 log(bw_g)   | 0.892427  | 0.021353   | 41.794  |
| 75 temp        | 0.064432  | 0.009122   | 7.063   |

76  
 77 **Model Suite 4: Estimated species intercept models with random slopes**  
 78 **Fixed Effect: Weight, Temp & Species; Random: Slope; Nested effect: Trial**

79  
 80 Formula:  $\log(\text{smr}) \sim \log(\text{bw\_g}) + (0 + \log(\text{bw\_g}) \mid \text{species}:\text{trial}) + \text{temp} +$   
 81  $\text{species} + (1 \mid \text{species}:\text{trial}) - 1$   
 82

|    |        |       |        |          |
|----|--------|-------|--------|----------|
| 83 | AIC    | BIC   | logLik | deviance |
| 84 | -173.6 | -62.6 | 107.8  | -215.6   |

85 Random effects:

| 86 | Groups          | Name        | Variance  | Std.Dev. |
|----|-----------------|-------------|-----------|----------|
| 87 | species.trial   | log(bw_g)   | 9.646e-05 | 0.009821 |
| 88 | species.trial.1 | (Intercept) | 1.690e-02 | 0.130014 |
| 89 | Residual        |             | 4.664e-02 | 0.215967 |

90 Fixed effects:

| 91                                 | Estimate | Std. Error | t value |
|------------------------------------|----------|------------|---------|
| 92 log(bw_g)                       | 0.86787  | 0.01503    | 57.737  |
| 93 temp                            | 0.07951  | 0.00860    | 9.245   |
| 94 speciesAtlantic_Cod             | -2.60234 | 0.13075    | -19.904 |
| 95 speciesAtlantic_Salmon          | -2.97524 | 0.15883    | -18.732 |
| 96 speciesBarramundi               | -3.85023 | 0.25339    | -15.195 |
| 97 speciesBlue_green_puller        | -3.50494 | 0.28662    | -12.229 |
| 98 speciesBrown_Trout              | -3.09260 | 0.14562    | -21.238 |
| 99 speciesCommon_Minnow            | -3.21739 | 0.13966    | -23.037 |
| 100 speciesCommon_Triplesfin       | -3.38329 | 0.17603    | -19.220 |
| 101 speciesCunner                  | -3.20142 | 0.14308    | -22.374 |
| 102 speciesE_sea_bass              | -3.15763 | 0.21737    | -14.527 |
| 103 speciesEuropean_Eel            | -4.36195 | 0.21847    | -19.966 |
| 104 speciesHapuku_Wreckfish        | -2.79732 | 0.18231    | -15.344 |
| 105 speciesPolar_Cod               | -2.09188 | 0.10157    | -20.596 |
| 106 speciesRainbow_Trout           | -2.97451 | 0.16811    | -17.694 |
| 107 speciesRound_Goby              | -3.77453 | 0.18875    | -19.998 |
| 108 speciesThree_Spine_Stickleback | -3.04785 | 0.17055    | -17.871 |
| 109 speciesTwister                 | -3.15609 | 0.23313    | -13.538 |

110 **Supplementary material 3: Lobster repeated body mass (grams) measurement data used in Box**  
 111 **1 (NC=Not conducted)**

| ID | weight1 (g) | weight2 (g) | weight3 (g) | Weight<br>double dry<br>time (g) |
|----|-------------|-------------|-------------|----------------------------------|
| 1  | 930         | 937         | 938         | 932                              |
| 2  | 2725        | 2739        | 2744        | 2725                             |
| 3  | 818         | 820         | 822         | NC                               |
| 4  | 1214        | 1222        | 1226        | NC                               |
| 5  | 2430        | 2432        | 2437        | 2426                             |
| 6  | 231         | 233         | 230         | 227                              |
| 7  | 240         | 243         | 242         | NC                               |
| 8  | 179         | 178         | 178         | 175                              |
| 9  | 184         | 184         | 185         | NC                               |
| 10 | 1859        | 1865        | 1859        | NC                               |
| 11 | 915         | 917         | 919         | 912                              |
| 12 | 242         | 243         | 242         | NC                               |
| 13 | 539         | 539         | 539         | 535                              |
| 14 | 385         | 382         | 392         | 380                              |
| 15 | 491         | 492         | 492         | NC                               |
| 16 | 436         | 435         | 439         | NC                               |
| 17 | 616         | 618         | 618         | NC                               |
| 22 | 599         | 601         | 602         | NC                               |
| 23 | 432         | 432         | 432         | NC                               |
| 24 | 497         | 496         | 499         | NC                               |
| 25 | 532         | 534         | 533         | NC                               |
| 26 | 195         | 195         | 195         | NC                               |
| 27 | 288         | 289         | 288         | NC                               |
| 28 | 1382        | 1391        | 1388        | NC                               |
| 29 | 188         | 188         | 189         | NC                               |
| 31 | 433         | 433         | 435         | NC                               |
| 36 | 386         | 387         | 388         | NC                               |
| 37 | 334         | 333         | 335         | NC                               |
| 38 | 189         | 189         | 189         | NC                               |
| 39 | 716         | 715         | 717         | NC                               |
| 40 | 466         | 465         | 468         | NC                               |
| 41 | 1112        | 1116        | 1119        | NC                               |

## Evidentialist metabolic scaling

|    |      |      |      |    |
|----|------|------|------|----|
| 42 | 1167 | 1171 | 1171 | NC |
| 43 | 767  | 767  | 767  | NC |
| 44 | 328  | 328  | 329  | NC |
| 45 | 411  | 412  | 412  | NC |
| 46 | 420  | 419  | 418  | NC |
| 47 | 210  | 209  | 211  | NC |
| 48 | 291  | 290  | 290  | NC |
| 49 | 1578 | 1577 | 1578 | NC |
| 50 | 1212 | 1214 | 1214 | NC |
| 51 | 368  | 368  | 367  | NC |
| 52 | 411  | 413  | 413  | NC |
| 53 | 2575 | 2575 | 2576 | NC |
| 54 | 1289 | 1297 | 1293 | NC |

112  
113

114 **Supplementary material 4: Output of models described in Box 5 used to evaluate temperature**

115

116 In the body of this paper (Box 5), for conceptual clarity, we have written the joint effects of  
 117  $\log(\text{weight})$  and the  $\log(\text{weight}) \times \text{Temp}$  interaction as a temperature sensitive coefficient for  
 118  $\log(\text{weight})$ ,  $\hat{\beta}(\text{temp})$ .  $\hat{\beta}(\text{temp})$  is a linear combination of  $\hat{\beta}_{\log(\text{weight})}$  and  $\hat{\beta}_{\log(\text{weight}) * \text{temp}}$ , with a  
 119 combination weight vector of (1 T). When estimated,  $\hat{\beta}_{\log(\text{weight})}$  and  $\hat{\beta}_{\log(\text{weight}) * \text{temp}}$  are random  
 120 variables—they are estimated with error. The variance of any linear combination of a random vector  
 121 is given by a quadratic form of the variance/covariance matrix for the random vector (see Searle  
 122 1971, p 40).

123

124 In this case, the standard error for the temperature sensitive scaling is

125  $SE \hat{\beta}(\text{Temp})$ 

$$126 = \sqrt{\text{var}(\hat{\beta}_{\log(\text{weight})}) + \text{var}(\hat{\beta}_{\log(\text{weight}) * \text{temp}}) * \text{temp}^2 + 2 * \text{covar}(\log(\text{weight}) * \text{temp})}$$

127 where,

128  $\text{var}(\hat{\beta}_{\log(\text{weight})})$  is the variance of the  $\log(\text{weight})$  parameter,129  $\text{var}(\hat{\beta}_{\log(\text{weight}) * \text{temp}})$  is the variance of the  $\log(\text{weight}) * \text{temp}$  interaction parameter,

130 and,

131  $\text{covar}(\hat{\beta}_{\log(\text{weight}) * \text{temp}})$  is the covariance of  $\hat{\beta}_{\log(\text{weight})}$  and  $\hat{\beta}_{\log(\text{weight}) * \text{temp}}$ . Values of  
 132 parameter variance and covariance can be extracted from the lme4 package using the  
 133 `covar(model)` command.

134

135 **Temp interaction on the fixed slope model**

136

137 No temp

138 M17:  $\log(\text{smr}) \sim \log(\text{bw\_g}) + (1 | \text{species}) + (1 | \text{species}:\text{trial})$ 

139

140 Fixed factor temp

141 M1:  $\log(\text{smr}) \sim \log(\text{bw\_g}) + \text{temp} + (1 | \text{species}) + (1 | \text{species}:\text{trial})$ 

142

143 Fixed factor temp with interaction

144 M18:  $\log(\text{smr}) \sim \log(\text{bw\_g}) + \text{temp} + \text{temp} * (\log(\text{bw\_g})) + (1 | \text{species})$ 

145

146 **Temp interaction on the random slope model**

147 No temp

148 M19:  $\log(\text{smr}) \sim \log(\text{bw\_g}) + (1 + \log(\text{bw\_g}) | \text{species}:\text{trial}) + (1 | \text{species})$ 

149

150 Fixed factor temp

151 M9:  $\log(\text{smr}) \sim \log(\text{bw\_g}) + (1 + \log(\text{bw\_g}) | \text{species}:\text{trial}) + \text{temp} + (1 | \text{species})$ 

152

153 Fixed factor temp with interaction

154 M20:  $\log(\text{smr}) \sim \log(\text{bw\_g}) + (1 + \log(\text{bw\_g}) | \text{species}:\text{trial}) + \text{temp} + \text{temp} * (\log(\text{bw\_g})) + (1$   
 155  $| \text{species}) + (1 | \text{species}:\text{trial})$

156

157

158

159

160 **OUTPUT**

161  
 162 **M17: Formula: log(smr) ~ log(bw\_g) + (1 | species) + (1 | species:trial)**  
 163

|     |                 |             |          |          |          |
|-----|-----------------|-------------|----------|----------|----------|
| 164 | AIC             | BIC         | logLik   | deviance | df.resid |
| 165 | -107.2          | -80.7       | 58.6     | -117.2   | 1451     |
| 166 | Random effects: |             |          |          |          |
| 167 | Groups          | Name        | Variance | Std.Dev. |          |
| 168 | species:trial   | (Intercept) | 0.07578  | 0.2753   |          |
| 169 | species         | (Intercept) | 0.09193  | 0.3032   |          |
| 170 | Residual        |             | 0.04679  | 0.2163   |          |

|     |                |          |            |         |  |
|-----|----------------|----------|------------|---------|--|
| 171 | Fixed effects: |          |            |         |  |
| 172 |                | Estimate | Std. Error | t value |  |
| 173 | (Intercept)    | -1.91897 | 0.09988    | -19.21  |  |
| 174 | log(bw_g)      | 0.87241  | 0.01475    | 59.14   |  |

175  
 176  
 177  
 178  
 179 **M1: Formula: log(smr) ~ log(bw\_g) + temp + (1 | species) + (1 | species:trial)**  
 180

|     |                 |             |          |          |          |
|-----|-----------------|-------------|----------|----------|----------|
| 181 | AIC             | BIC         | logLik   | deviance | df.resid |
| 182 | -135.9          | -104.2      | 74.0     | -147.9   | 1450     |
| 183 | Random effects: |             |          |          |          |
| 184 | Groups          | Name        | Variance | Std.Dev. |          |
| 185 | species:trial   | (Intercept) | 0.02732  | 0.1653   |          |
| 186 | species         | (Intercept) | 0.19460  | 0.4411   |          |
| 187 | Residual        |             | 0.04673  | 0.2162   |          |

|     |                |           |            |         |  |
|-----|----------------|-----------|------------|---------|--|
| 188 | Fixed effects: |           |            |         |  |
| 189 |                | Estimate  | Std. Error | t value |  |
| 190 | (Intercept)    | -2.976252 | 0.189430   | -15.712 |  |
| 191 | Log(bw_g)      | 0.868000  | 0.014608   | 59.420  |  |
| 192 | temp           | 0.065868  | 0.008854   | 7.439   |  |

193  
 194  
 195  
 196  
 197 **M18: Formula: log(smr) ~ log(bw\_g) + temp + temp \* (log(bw\_g)) + (1 | species) + (1 | species:trial)**  
 198

|     |                 |             |          |          |          |
|-----|-----------------|-------------|----------|----------|----------|
| 199 | AIC             | BIC         | logLik   | deviance | df.resid |
| 200 | -134.6          | -97.7       | 74.3     | -148.6   | 1449     |
| 201 | Random effects: |             |          |          |          |
| 202 | Groups          | Name        | Variance | Std.Dev. |          |
| 203 | species:trial   | (Intercept) | 0.02800  | 0.1673   |          |
| 204 | species         | (Intercept) | 0.19842  | 0.4454   |          |
| 205 | Residual        |             | 0.04666  | 0.2160   |          |

|     |                |           |            |         |  |
|-----|----------------|-----------|------------|---------|--|
| 206 | Fixed effects: |           |            |         |  |
| 207 |                | Estimate  | Std. Error | t value |  |
| 208 | (Intercept)    | -2.830956 | 0.254823   | -11.110 |  |
| 209 | log(bw_g)      | 0.828807  | 0.047818   | 17.333  |  |
| 210 | temp           | 0.056580  | 0.013960   | 4.053   |  |
| 211 | log(bw_g):temp | 0.002536  | 0.002931   | 0.865   |  |

|     |                            |              |               |               |                |
|-----|----------------------------|--------------|---------------|---------------|----------------|
| 212 | Variance-Covariance Matrix |              |               |               |                |
| 213 |                            | (Intercept)  | log(bw_g)     | temp          | log(bw_g):temp |
| 214 | (Intercept)                | 0.0649346847 | -0.0083274299 | -3.110329e-03 | 4.935793e-04   |

## Evidentialist metabolic scaling

218           log(bw\_g)       -0.0083274299   0.0022865299   4.885162e-04   -1.334289e-04  
 219           temp           -0.0031103293   0.0004885162   1.948952e-04   -3.141428e-05  
 220           log(bw\_g):temp   0.0004935793   -0.0001334289   -3.141428e-05   8.589476e-06

221

222 **M19: Formula: log(smr) ~ log(bw\_g) + (1 + log(bw\_g) | species:trial) + (1 | species)**

223

|     |                 |       |                           |          |          |       |
|-----|-----------------|-------|---------------------------|----------|----------|-------|
| 224 | AIC             | BIC   | logLik                    | deviance | df.resid |       |
| 225 | -123.1          | -86.1 | 68.5                      | -137.1   | 1449     |       |
| 226 | Random effects: |       |                           |          |          |       |
| 227 | Groups          |       | Name                      | Variance | Std.Dev. | Corr  |
| 228 |                 |       | species:trial (Intercept) | 0.11710  | 0.3422   |       |
| 229 |                 |       | log(bw_g)                 | 0.01064  | 0.1031   | -0.80 |
| 230 |                 |       | species (Intercept)       | 0.13715  | 0.3703   |       |
| 231 |                 |       | Residual                  | 0.04538  | 0.2130   |       |

232

233 Fixed effects:

|     |             |          |            |         |
|-----|-------------|----------|------------|---------|
| 234 |             | Estimate | Std. Error | t value |
| 235 | (Intercept) | -2.03282 | 0.13165    | -15.44  |
| 236 | log(bw_g)   | 0.90837  | 0.02582    | 35.18   |

237

238 **M9: Formula: log(smr) ~ log(bw\_g) + (1 + log(bw\_g) | species:trial) + temp + (1 | species)**

239

|     |                 |        |                           |          |          |       |
|-----|-----------------|--------|---------------------------|----------|----------|-------|
| 240 | AIC             | BIC    | logLik                    | deviance | df.resid |       |
| 241 | -147.8          | -105.6 | 81.9                      | -163.8   | 1448     |       |
| 242 | Random effects: |        |                           |          |          |       |
| 243 | Groups          |        | Name                      | Variance | Std.Dev. | Corr  |
| 244 |                 |        | species:trial (Intercept) | 0.070458 | 0.2654   |       |
| 245 |                 |        | log(bw_g)                 | 0.004998 | 0.0707   | -0.86 |
| 246 |                 |        | species (Intercept)       | 0.231253 | 0.4809   |       |
| 247 |                 |        | Residual                  | 0.045650 | 0.2137   |       |

248

249 Fixed effects:

|     |             |           |            |         |
|-----|-------------|-----------|------------|---------|
| 250 |             | Estimate  | Std. Error | t value |
| 251 | (Intercept) | -3.019453 | 0.206274   | -14.638 |
| 252 | log(bw_g)   | 0.892427  | 0.021353   | 41.794  |
| 253 | temp        | 0.064432  | 0.009122   | 7.063   |

254

255 **M20: Formula: log(smr) ~ log(bw\_g) + (1 + log(bw\_g) | species:trial) + temp + temp \* (log(bw\_g)) + (1 | species)**

256

|     |                 |       |                           |          |          |       |
|-----|-----------------|-------|---------------------------|----------|----------|-------|
| 257 | AIC             | BIC   | logLik                    | deviance | df.resid |       |
| 258 | -145.9          | -98.4 | 82.0                      | -163.9   | 1447     |       |
| 259 | Random effects: |       |                           |          |          |       |
| 260 | Groups          |       | Name                      | Variance | Std.Dev. | Corr  |
| 261 |                 |       | species:trial (Intercept) | 0.070663 | 0.2658   |       |
| 262 |                 |       | log(bw_g)                 | 0.004901 | 0.0700   | -0.86 |
| 263 |                 |       | species (Intercept)       | 0.232109 | 0.4818   |       |
| 264 |                 |       | Residual                  | 0.045649 | 0.2137   |       |

265

266 Fixed effects:

|     |                |           |            |         |
|-----|----------------|-----------|------------|---------|
| 267 |                | Estimate  | Std. Error | t value |
| 268 | (Intercept)    | -2.958265 | 0.281762   | -10.499 |
| 269 | log(bw_g)      | 0.874656  | 0.057701   | 15.158  |
| 270 | temp           | 0.060812  | 0.014717   | 4.132   |
| 271 | log(bw_g):temp | 0.001061  | 0.003270   | 0.324   |

272

273 Variance-Covariance Matrix

|     |             |           |      |                |
|-----|-------------|-----------|------|----------------|
| 274 | (Intercept) | log(bw_g) | temp | log(bw_g):temp |
|-----|-------------|-----------|------|----------------|

275



## Evidentialist metabolic scaling

|     |                |               |               |               |               |
|-----|----------------|---------------|---------------|---------------|---------------|
| 276 | (Intercept)    | 0.0793900196  | -0.0117618489 | -3.573021e-03 | 6.271892e-04  |
| 277 | log(bw_g)      | -0.0117618489 | 0.0033294100  | 6.198137e-04  | -1.753920e-04 |
| 278 | temp           | -0.0035730207 | 0.0006198137  | 2.165976e-04  | -3.776815e-05 |
| 279 | log(bw_g):temp | 0.0006271892  | -0.0001753920 | -3.776815e-05 | 1.069525e-05  |
| 280 |                |               |               |               |               |
| 281 |                |               |               |               |               |
